# Supplementary material for: Mechanisms Driving Microbial Community Composition in Anaerobic Co-Digestion of Waste-Activated Sewage Sludge
Source: MDPI journal article supplement (doi:10.3390/bioengineering8120197), 2021-11-30
Supplement: s1 [file s1]

## Supplementary

**Table S1** reads per sample and Domain, not including Eukaryote sequences

| <b>Sample</b>        | <b>reads total</b> | <b>reads Archaea</b> | <b>reads Bacteria</b> |
|----------------------|--------------------|----------------------|-----------------------|
| Inoculum FW 00 FT    | 280112             | 8870                 | 280112                |
| Control FW 01 IV     | 201339             | 19039                | 201339                |
| Control FW 01 V      | 288360             | 29026                | 288360                |
| Control FW 01 VI     | 152812             | 12259                | 152812                |
| Control FW 02 IV     | 263303             | 19594                | 263303                |
| Control FW 02 V      | 65749              | 5590                 | 65749                 |
| Control FW 02 VI     | 105938             | 8896                 | 105938                |
| Control FW 03 IV     | 249726             | 22569                | 249726                |
| Control FW 03 V      | 231245             | 15856                | 231245                |
| Control FW 03 VI     | 261460             | 22382                | 261460                |
| Control FW 04 IV     | 276280             | 13762                | 276280                |
| Control FW 04 V      | 293577             | 15741                | 293577                |
| Control FW 04 VI     | 296935             | 18210                | 296935                |
| Experiment FW 01 I   | 149585             | 10937                | 149585                |
| Experiment FW 01 II  | 163115             | 15715                | 163115                |
| Experiment FW 01 III | 243854             | 23620                | 243854                |
| Experiment FW 02 I   | 111211             | 7025                 | 111211                |
| Experiment FW 02 II  | 178783             | 13330                | 178783                |
| Experiment FW 02 III | 168336             | 11136                | 168336                |
| Experiment FW 03 I   | 185405             | 15158                | 185405                |
| Experiment FW 03 II  | 270371             | 19566                | 270371                |
| Experiment FW 03 III | 223584             | 15877                | 223584                |
| Experiment FW 04 I   | 74361              | 4898                 | 74361                 |
| Experiment FW 04 II  | 65274              | 4293                 | 65274                 |
| Experiment FW 04 III | 298996             | 18549                | 298996                |
| Inoculum CL 00 FT    | 192730             | 12306                | 192730                |
| Control CL 01 IV     | 82742              | 3502                 | 82742                 |
| Control CL 01 V      | 79589              | 2927                 | 79589                 |
| Control CL 01 VI     | 98324              | 4139                 | 98324                 |
| Control CL 02 IV     | 85216              | 4575                 | 85216                 |
| Control CL 02 V      | 102945             | 4235                 | 102945                |
| Control CL 02 VI     | 108543             | 5904                 | 108543                |
| Control CL 03 IV     | 74002              | 2913                 | 74002                 |
| Control CL 03 V      | 94796              | 2900                 | 94796                 |
| Control CL 03 VI     | 83768              | 2705                 | 83768                 |
| Control CL 04 IV     | 79766              | 3923                 | 79766                 |
| Control CL 04 V      | 67265              | 3685                 | 67265                 |
| Control CL 04 VI     | 86172              | 3835                 | 86172                 |
| Experiment CL 01 I   | 86495              | 3056                 | 86495                 |
| Experiment CL 01 II  | 44479              | 2162                 | 44479                 |
| Experiment CL 01 III | 84494              | 3755                 | 84494                 |
| Experiment CL 02 I   | 144233             | 6078                 | 144233                |
| Experiment CL 02 II  | 88119              | 3842                 | 88119                 |
| Experiment CL 02 III | 108729             | 4469                 | 108729                |
| Experiment CL 03 I   | 114169             | 3327                 | 114169                |
| Experiment CL 03 II  | 87545              | 2311                 | 87545                 |
| Experiment CL 03 III | 162026             | 4728                 | 162026                |
| Experiment CL 04 I   | 74796              | 2919                 | 74796                 |

|                      |        |       |        |
|----------------------|--------|-------|--------|
| Experiment CL 04 II  | 77748  | 3110  | 77748  |
| Experiment CL 04 III | 99390  | 4110  | 99390  |
| PWASS CL 01 All      | 61674  | 86    | 61674  |
| PWASS CL 02 All      | 204026 | 11764 | 204026 |
| PWASS CL 03 All      | 169445 | 723   | 169445 |
| PWASS CL 04 All      | 78244  | 248   | 78244  |
| PWASS FW 01 All      | 97649  | 777   | 97649  |
| PWASS FW 02 All      | 233823 | 939   | 233823 |
| PWASS FW 03 All      | 59138  | 164   | 59138  |
| PWASS FW 04 All      | 18630  | 51    | 18630  |
| WWTP CL 02 FT        | 231875 | 17870 | 231875 |
| WWTP CL 03 FT        | 254850 | 14953 | 254850 |
| WWTP CL 04 FT        | 251352 | 18986 | 251352 |
| WWTP FW 01 FT        | 340821 | 20850 | 340821 |
| WWTP FW 02 FT        | 372229 | 16087 | 372229 |
| WWTP FW 03 FT        | 392501 | 24419 | 392501 |
| WWTP FW 04 FT        | 210700 | 21230 | 210700 |

**Table S2.** Shannon Diversity.

| <b>Treatment</b>    | <b>Experiment</b> | <b>runtime in days</b> | <b>Shannon index</b> |
|---------------------|-------------------|------------------------|----------------------|
| Inoculum T0         | FW                | 0                      | 5,19                 |
| Control T1          | FW                | 27                     | 5,05                 |
| Control T2          | FW                | 41                     | 5,10                 |
| Control T3          | FW                | 90                     | 5,02                 |
| Control T4          | FW                | 125                    | 4,98                 |
| Experiment T1 (0%)  | FW                | 27                     | 5,07                 |
| Experiment T2 (10%) | FW                | 41                     | 5,04                 |
| Experiment T3 (20%) | FW                | 90                     | 5,01                 |
| Experiment T4 (30%) | FW                | 125                    | 4,95                 |
| Inoculum T0         | CL                | 0                      | 4,97                 |
| Control T1          | CL                | 1                      | 5,01                 |
| Control T2          | CL                | 29                     | 4,98                 |
| Control T3          | CL                | 71                     | 5,15                 |
| Control T4          | CL                | 92                     | 5,13                 |
| Experiment T1 (0%)  | CL                | 1                      | 5,02                 |
| Experiment T2 (10%) | CL                | 29                     | 4,88                 |
| Experiment T3 (20%) | CL                | 71                     | 4,78                 |
| Experiment T4 (30%) | CL                | 92                     | 4,59                 |
| PWASS 1             | FW                | 0                      | 6,27                 |
| PWASS 2             | FW                | 9                      | 6,54                 |
| PWASS 3             | FW                | 51                     | 6,02                 |
| PWASS 4             | FW                | 95                     | 5,94                 |
| PWASS 5             | CL                | 2                      | 5,64                 |
| PWASS 6             | CL                | 31                     | 4,98                 |
| PWASS 7             | CL                | 64                     | 6,15                 |
| PWASS 8             | CL                | 93                     | 5,53                 |
| WWTP FW T1          | FW                | 14                     | 5,22                 |
| WWTP FW T2          | FW                | 35                     | 4,75                 |
| WWTP FW T3          | FW                | 77                     | 5,47                 |
| WWTP FW T4          | FW                | 113                    | 5,26                 |
| WWTP CL T2          | CL                | 43                     | 5,09                 |

|            |    |    |      |
|------------|----|----|------|
| WWTP CL T3 | CL | 70 | 5,04 |
| WWTP CL T4 | CL | 84 | 4,91 |

---

Shown are different Treatments of the two experiments (FW = Food Waste, CL = Canola Lecithin) at different timepoints from inoculation (T0) to addition of 30% co-substrate in the experimental reactors (T4), with the corresponding runtime and respective PWASS batches and full scale WWTP samples (WWTP)
